# Mutant Ubiquitin Attenuates Interleukin-1 $\beta$ - and Tumor Necrosis Factor- $\alpha$ -Induced Pro-Inflammatory Signaling in Human Astrocytic Cells

Kyungsun Choi<sup>1\*</sup>, Junseong Park<sup>1,2</sup>, Jungsul Lee<sup>1</sup>, Eun Chun Han<sup>3</sup>, Chulhee Choi<sup>1,2,3\*</sup>

**1** Cell Signaling and Biolmaging Laboratory, Department of Bio and Brain Engineering, KAIST, Daejeon, Korea, **2** KI for the BioCentury, KAIST, Daejeon, Korea, **3** Graduate School of Medical Science and Engineering, KAIST, Daejeon, Korea

## Abstract

A frameshift mutation of ubiquitin called ubiquitin<sup>+1</sup> (UBB<sup>+1</sup>) was found in the aging and Alzheimer's disease brains and thought to be associated with neuronal dysfunction and degeneration. Even though ubiquitylation has been known to regulate vital cellular functions mainly through proteasome-dependent degradation of polyubiquitinated substrates, proteolysis-independent roles of ubiquitylation have emerged as key mechanisms in various signaling cascades. In this study, we have investigated the effect of UBB<sup>+1</sup> on proinflammatory signaling such as interleukin-1 $\beta$  (IL-1 $\beta$ ) and tumor necrosis factor- $\alpha$  (TNF- $\alpha$ ) in human astrocytes. Treatment with TNF- $\alpha$  and IL-1 $\beta$  induced expression of CCL2 and CXCL8 by human astrocytic cells; while ectopic expression of UBB<sup>+1</sup> significantly abrogated the proinflammatory cytokine-induced expression of chemokines. Ectopic expression of UBB<sup>+1</sup> suppressed TNF- $\alpha$ - and IL-1 $\beta$ -induced activation of NF- $\kappa$ B and JNK signaling pathway. Furthermore, we have demonstrated that polyubiquitylation of TRAFs and subsequent phosphorylation of TAK1 were significantly inhibited by stable expression of UBB<sup>+1</sup>. Collectively, these results suggest that UBB<sup>+1</sup> may affect proinflammatory signaling in the central nervous system via inhibitory mechanisms of ubiquitin-dependent signaling in human astrocytes.

**Citation:** Choi K, Park J, Lee J, Han EC, Choi C (2013) Mutant Ubiquitin Attenuates Interleukin-1 $\beta$ - and Tumor Necrosis Factor- $\alpha$ -Induced Pro-Inflammatory Signaling in Human Astrocytic Cells. PLoS ONE 8(7): e67891. doi:10.1371/journal.pone.0067891

**Editor:** Karin E. Peterson, National Institute of Allergy and Infectious Diseases - Rocky Mountain Laboratories, United States of America

**Received:** January 8, 2013; **Accepted:** May 22, 2013; **Published:** July 3, 2013

**Copyright:** © 2013 Choi et al. This is an open-access article distributed under the terms of the Creative Commons Attribution License, which permits unrestricted use, distribution, and reproduction in any medium, provided the original author and source are credited.

**Funding:** This work was supported by the National Research Foundation of Korea (NRF) grant (No. 2012R1A2A4A01007108) funded by the Korea government(MEST) (to C.C.). The funders had no role in study design, data collection and analysis, decision to publish, or preparation of the manuscript.

**Competing Interests:** The authors have declared that no competing interests exist.

\* E-mail: ccbioks@kaist.ac.kr (KC); cchoi@kaist.ac.kr (CC)

## Introduction

Ubiquitylation has been well characterized to regulate vital cellular processes mainly through proteasome-dependent degradation of polyubiquitinated substrates; however, proteolysis-independent roles of ubiquitylation have emerged as key mechanisms in various signaling cascades [1,2]. Typically, polyubiquitin chains that target proteins for degradation by the proteasome are linked through K48 of ubiquitin. On the contrary, K63-linked polyubiquitin chains play multiple roles in kinase activation, DNA repair and intracellular trafficking via proteasome-independent mechanisms [3,4].

A frameshift mutation of ubiquitin called ubiquitin<sup>+1</sup> (UBB<sup>+1</sup>) was found in the aging and Alzheimer's disease (AD) brains [5–7]. UBB<sup>+1</sup> is generated by transcriptional dinucleotide deletion within the mRNA resulting in a 19-amino acid extension at the C-terminus of ubiquitin [5]. This mutant ubiquitin cannot link to substrates targeted for proteasomal degradation, but is ubiquitylated to form a polyubiquitin chain. Ubiquitylated UBB<sup>+1</sup> is refractory to deubiquitination, resulting in dominant inhibition of the ubiquitin-proteasome system (UPS) [7–9]. Recent evidences have revealed that UBB<sup>+1</sup> is detected as pathological hallmarks in various neurodegenerative diseases and exacerbates the proteasomal dysfunction and deposition of toxic proteins [9–11]. It was also reported that UBB<sup>+1</sup> exerts a neurotoxic effect by suppressing proteasome-dependent proteolysis in neurons [12]. Although

UBB<sup>+1</sup> can be found in non-neuronal cells [7,13,14], its functional significance has not yet been fully determined.

Astrocytes, the most abundant glial cells in the central nervous system (CNS), play important roles in maintaining the homeostatic environment and immune regulation, producing a repertoire of inflammatory mediators including chemokines, cytokines and adhesion molecules [15,16]. Interleukin-1 $\beta$  (IL-1 $\beta$ ) and tumor necrosis factor- $\alpha$  (TNF- $\alpha$ ) serve as major regulators of immune and inflammatory responses in the CNS, and elevated expression of these cytokines occurs in injury, infection, stroke, inflammation and degenerative disorders such as AD [17,18]. These proinflammatory cytokines induce expression of multiple genes associated with inflammation by human astrocytes [19]. In response to IL-1 $\beta$  and TNF- $\alpha$ , ubiquitylation-dependent activation of TNF-associated factor (TRAF) 6 and TRAF2 complexes leads to activation of TGF- $\beta$ -activated kinase 1 (TAK1) which activates nuclear factor kappa B (NF- $\kappa$ B) and c-Jun NH<sub>2</sub>-terminus kinase (JNK) pathways [20,21]. In this study, we investigated the effect of UBB<sup>+1</sup> on proinflammatory signaling such as IL-1 $\beta$  and TNF- $\alpha$  in human astrocytes, and its functional relevance of ubiquitin-dependent kinase activation.

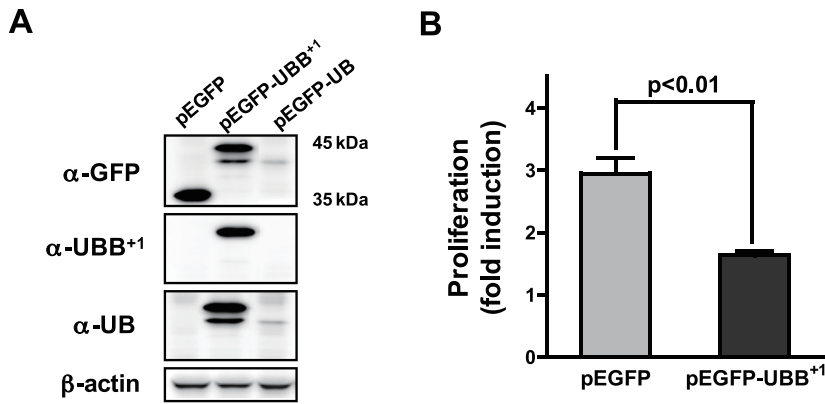

**Figure 1. Ectopic expression of UBB<sup>+1</sup> in human astrocytic cell.** (A) CRT-MG cells were stably transfected with pEGFP, pEGFP-UBB<sup>+1</sup> or pEGFP-UB constructs. Cell lysates were examined for EGFP, UBB<sup>+1</sup> or wild-type UB protein by immunoblot analysis. (B) Cells stably transfected with pEGFP or pEGFP-UBB<sup>+1</sup> constructs were plated on 60 mm<sup>2</sup> dishes ( $3 \times 10^5$  cells). After two days of culture, total cell number was counted after trypsinization. Proliferation rate was calculated as the fold induction of final cell number compared to the original cell number. Data are the mean  $\pm$  SD for quadruplicate samples from two independent experiments. doi:10.1371/journal.pone.0067891.g001

## Materials and Methods

### 1. Cell Culture

Human astrocytoma CRT-MG cells [22,23] were maintained in RPMI 1640 medium that was supplemented with 2 mmol/L L-glutamine, 100 U/ml penicillin, and 100 g/L streptomycin and 10% heat-inactivated fetal bovine serum in a 5% CO<sub>2</sub> incubator at 37°C.

### 2. Stable UBB<sup>+1</sup> Cell Lines

For generation of the pEGFP-UBB<sup>+1</sup> construct, the UBB<sup>+1</sup> open reading frame was amplified by PCR from the pTet-Splice-UB plasmid and cloned in the *Eco*RI and *Hind*III sites of the EGFP-N1 vector (Clontech, Palo Alto, CA). Stable cell lines transfected with the pEGFP or pEGFP-UBB<sup>+1</sup> were generated. CRT-MG cells were transfected by electroporation (Amaxa Biosystems, Cologn, Germany) according to manufacturer's instructions. Stable transfectants were grown in medium containing 0.5 g/L G-418 (Life Technologies, Carlsbad, CA) and cloned. Stable clonal cells were sorted by flow cytometry (Becton Dickinson, Mountain View, CA) based on GFP fluorescence intensity.

### 3. Reagents

Human recombinant IL-1 $\beta$  and TNF- $\alpha$  were purchased from R & D system (Minneapolis, MN, USA). Antibodies against TRAF2/6 and  $\beta$ -actin were purchased from Santa Cruz Biotechnology (Santa Cruz, CA). Antibodies specific for IKK, phospho-IKK $\alpha$ / $\beta$  (Ser176/180), I $\kappa$ B $\alpha$ , phospho-I $\kappa$ B $\alpha$  (Ser32/36), MKK4, phospho-MKK4 (Ser257/Thr261), JNKs (p46 and p54), phospho-JNKs (Thr183/Try185), c-Jun, phospho-c-Jun (Ser73), ERK, phospho-ERK, TAK1 and phospho-TAK1 were purchased from Cell Signaling Biotechnology (Beverly, MA, USA). Antibodies specific for EGFP, ubiquitin and UBB<sup>+1</sup> were obtained from AbFrontier (Seoul, Korea).

### 4. ELISA

Concentrations of CXCL8 (a.k.a., IL-8) and CCL2 (a.k.a., MCP-1) in the supernatants were determined using dual-antibody solid phase ELISA (Biosource International, Camarillo, CA). Each chemokine expression was normalized by the total amount of protein.

### 5. Measurement of DNA Binding Activity of NF- $\kappa$ B and AP-1

Nuclear extracts were obtained as described previously [22]. Nuclear extracts (5  $\mu$ g) were assayed for the binding activity of p65/c-Rel (NF- $\kappa$ B) and c-jun (activator protein-1, AP-1) using the TransAM NF- $\kappa$ B and AP-1 assay kit (ActiveMotif, Carlsbad, CA, USA) according to the manufacturer's manual.

### 6. Western Blotting and Immunoprecipitation

Cell lysates were electrophoresed in 10% SDS-PAGE gels and then transferred to nitrocellulose and probed with anti-phospho-IKK, IKK, phospho-I $\kappa$ B $\alpha$ , I $\kappa$ B $\alpha$ , phospho-MKK4, MKK4, phospho-JNK, JNK, phospho-c-Jun, c-Jun, TAK1, phospho-TAK1 and  $\beta$ -actin. The blots were developed by chemiluminescence (AbFrontier). Cell lysates (500  $\mu$ g) were immunoprecipitated with 1  $\mu$ g of anti-TRAF2 antibody (Santa Cruz) for 12 h at 4°C, followed by an additional 3 h incubation with protein A/G beads (Pierce, Rockford, IL, USA). The immunocomplexes were analyzed by 8% SDS-PAGE gels and immunoblotted with ubiquitin and TAK1.

### 7. Statistical Analysis

Data are presented as mean  $\pm$  SD. Levels of significance for comparisons between samples were determined using Student's *t*-test distribution.

## Results

### 1. Effect of UBB<sup>+1</sup> on IL-1 $\beta$ - and TNF- $\alpha$ -induced Chemokine Expression

To address the effect of UBB<sup>+1</sup> on astrocytic functionality, we generated CRT-MG cells stably transfected with pEGFP or pEGFP-UBB<sup>+1</sup> as described in materials and methods (Fig. 1A). Immunoblot using anti-UBB<sup>+1</sup> antibody, specific to the 19 amino acid C-terminal epitope of UBB<sup>+1</sup> revealed a definite increase in UBB<sup>+1</sup> proteins in the cells transfected with pEGFP-UBB<sup>+1</sup>. These cells stably expressing UBB<sup>+1</sup> showed significantly lower growth rates compared to the control cells (Fig. 1B).

To delineate the effect of UBB<sup>+1</sup> on inflammatory response in astrocytes, we examined the expression of chemokines as a functional read-out for astroglial activation. In cells stably expressing pEGFP, treatment with IL-1 $\beta$  or TNF- $\alpha$  induced a

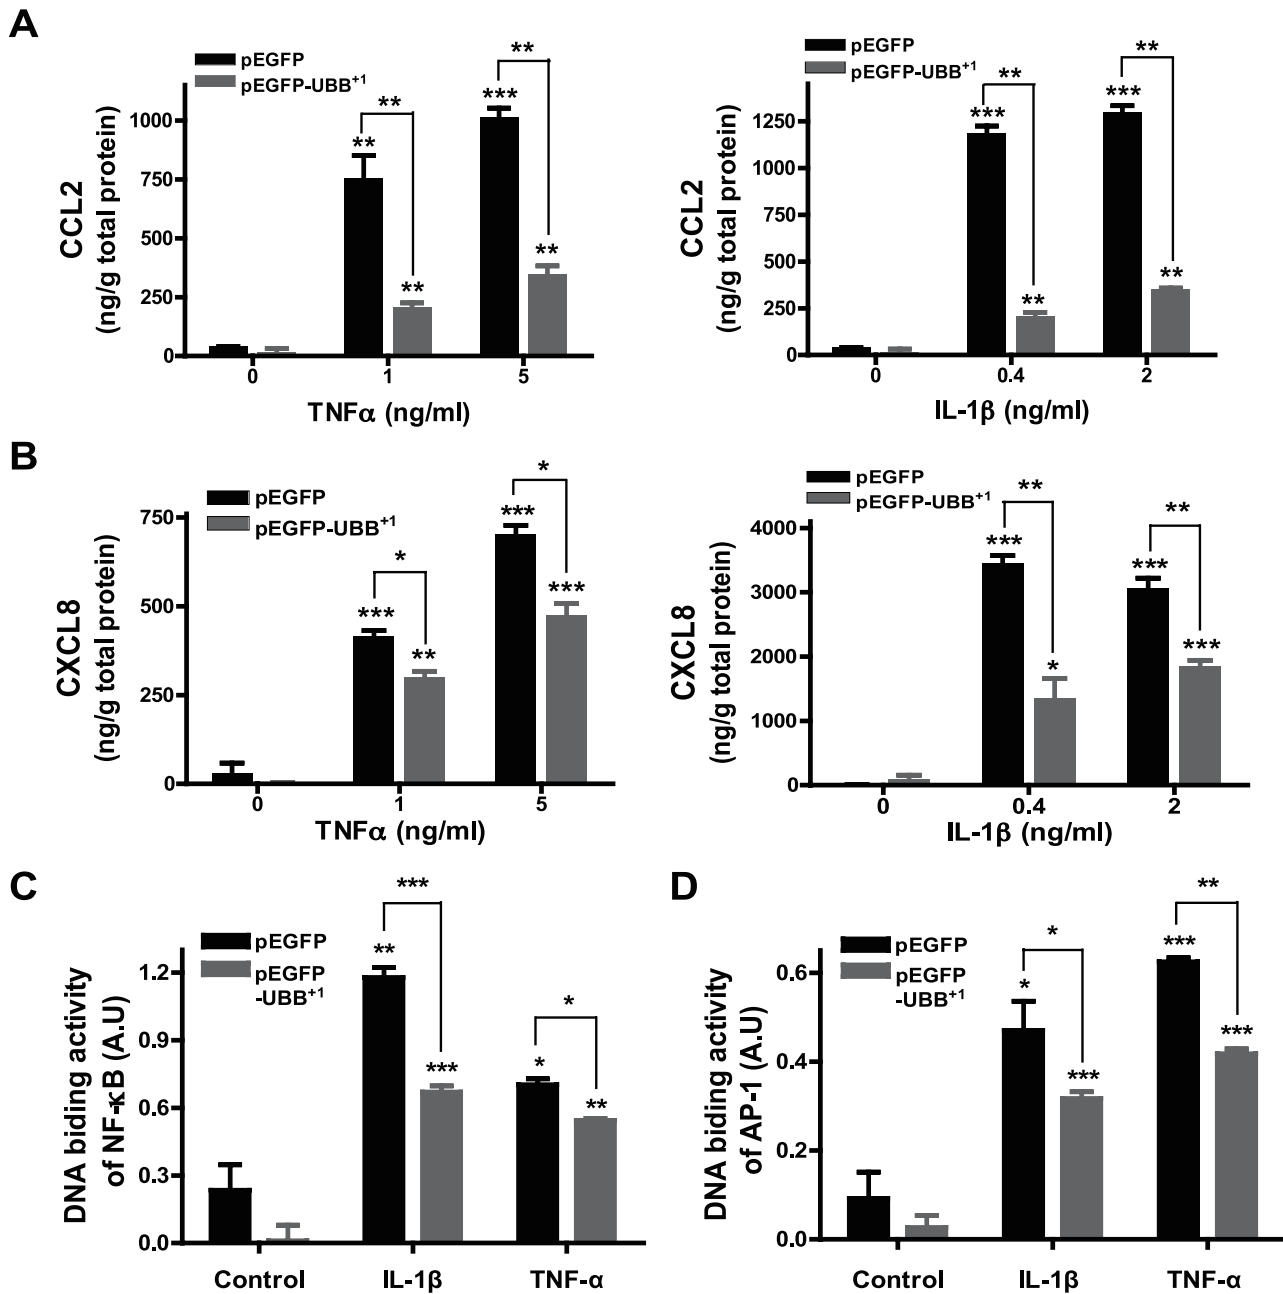

**Figure 2. Effect of UBB<sup>+1</sup> on IL-1 $\beta$ - and TNF- $\alpha$ -mediated chemokine expression.** CRT-MG cells stably expressing pEGFP or pEGFP-UBB<sup>+1</sup> were treated with varying doses of TNF- $\alpha$  or IL-1 $\beta$  for 24 h, and the supernatant was assayed for CCL-2 (A) or CXCL-8 (B) protein by ELISA. Control samples are the supernatants from the cells without any treatment. Representative of two independent experiments. Cells stably expressing pEGFP or pEGFP-UBB<sup>+1</sup> were treated with IL-1 $\beta$  (4  $\mu$ g/L) or TNF- $\alpha$  (10  $\mu$ g/L) for 30 min, and then the nuclear extracts from cells were assayed for the binding activity of p65/c-Rel (NF- $\kappa$ B) (C) or c-Jun (AP-1) (D). Values statistically significantly different from the value for the control samples without any treatment are indicated by asterisks (\*,  $p < 0.05$ ; \*\*,  $p < 0.01$ ; and \*\*\*,  $p < 0.001$ ). Representative of two independent experiments. doi:10.1371/journal.pone.0067891.g002

robust expression of CCL2 and CXCL8 in a dose-dependent manner, which was dramatically attenuated by stable expression of UBB<sup>+1</sup> (Fig. 2A & 2B). Since the expression of chemokines is known to be mainly regulated by activation of transcription factors such as NF- $\kappa$ B and AP-1 [24,25], we next check the effect of UBB<sup>+1</sup> on IL-1 $\beta$ - and TNF- $\alpha$ -induced activity of these transcription factors using a modified electrophoretic mobility shift assay as described in materials and methods. In control cells, treatment with IL-1 $\beta$  and TNF- $\alpha$  markedly induced the DNA binding

activity of NF- $\kappa$ B and AP-1, which was also significantly reduced by UBB<sup>+1</sup> expression (Fig. 2C & 2D).

## 2. Inhibitory Effect of UBB<sup>+1</sup> Expression on NF- $\kappa$ B and JNK Pathway

We next investigated the effect of stable UBB<sup>+1</sup> expression on TNF- $\alpha$ -induced NF- $\kappa$ B signaling pathway by immunoblot analysis. It has been reported that activity of NF- $\kappa$ B is regulated by I $\kappa$ B kinase (IKK)-mediated phosphorylation and subsequent proteoso-

**A**

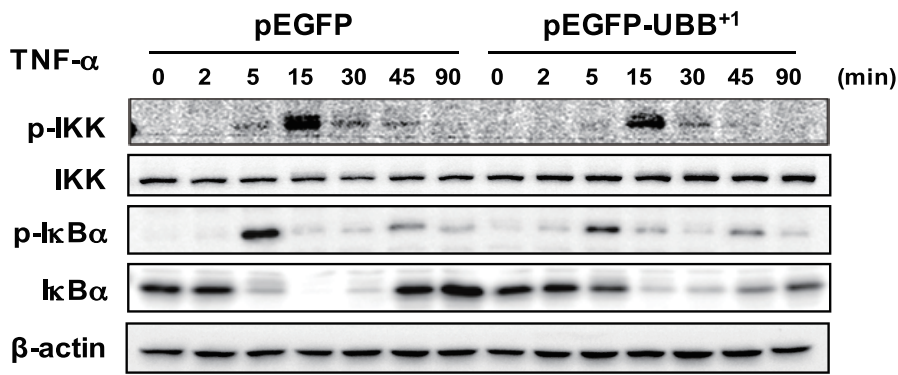

**B**

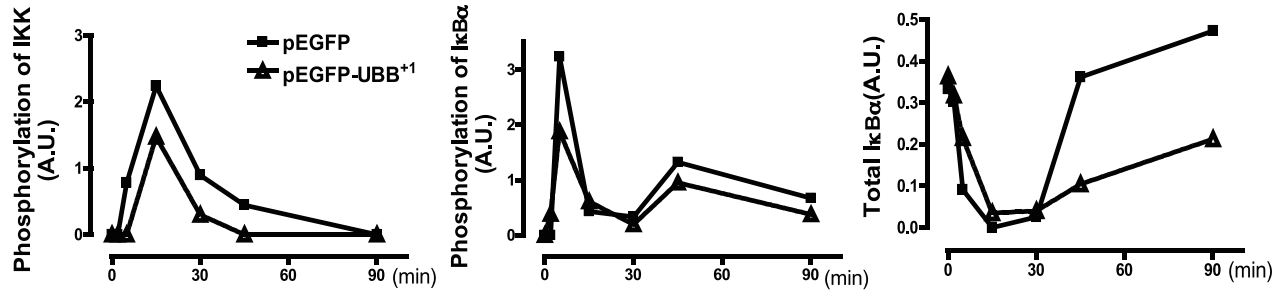

**C**

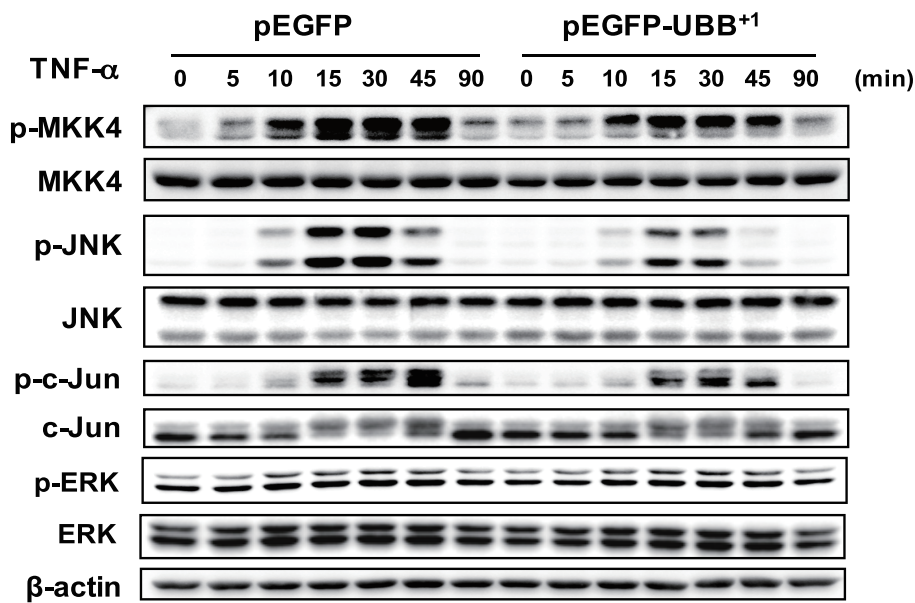

**D**

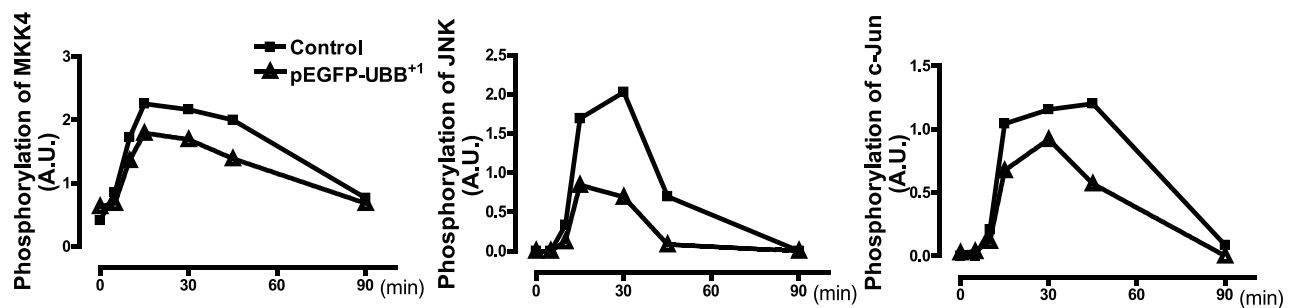

**Figure 3. Effect of UBB<sup>+1</sup> on the NF- $\kappa$ B and JNK pathway.** (A) CRT-MG cells stably expressing pEGFP or pEGFP-UBB<sup>+1</sup> were treated with TNF- $\alpha$  (10  $\mu$ g/L) for the indicated time periods. Cell lysates were examined by immunoblot analysis with antibodies to phospho-IKK, IKK, phospho-I $\kappa$ B $\alpha$ , I $\kappa$ B $\alpha$  and  $\beta$ -actin. (B) The relative amount of phosphorylated IKK, phosphorylated I $\kappa$ B $\alpha$  and total I $\kappa$ B $\alpha$  was plotted over the time upon TNF- $\alpha$  treatment in pEGFP-UBB<sup>+1</sup> stable cells (dotted line) and pEGFP stable cells (solid line). Ratiometric measurement of each blot was normalized by the value of  $\beta$ -actin. Representative of four independent experiments. (C) Cells stably expressing pEGFP or pEGFP-UBB<sup>+1</sup> were treated with TNF- $\alpha$  (10  $\mu$ g/L) for the indicated time periods. Cell lysates were examined by immunoblot analysis with antibodies to phospho-MKK4, MKK4, phospho-JNK, JNK, phospho-c-Jun, c-Jun, phospho-ERK1/2, ERK1/2 and  $\beta$ -actin. (D) The relative amount of phosphorylated MKK4, phosphorylated JNK and phosphorylated c-Jun was plotted over the time upon TNF- $\alpha$  treatment in pEGFP-UBB<sup>+1</sup> stable cells (dotted line) and pEGFP stable cells (solid line). Ratiometric measurement of each blot was normalized by the value of  $\beta$ -actin. Representative of four independent experiments.  
doi:10.1371/journal.pone.0067891.g003

mal degradation of I $\kappa$ B $\alpha$  leading to nuclear translocation of the NF- $\kappa$ B complex [26]. Treatment with TNF- $\alpha$  induced I $\kappa$ B $\alpha$  phosphorylation within 5 min of stimulation and subsequent degradation of I $\kappa$ B $\alpha$  by 15 min, which was followed by delayed expression of I $\kappa$ B $\alpha$  due to NF- $\kappa$ B-dependent I $\kappa$ B $\alpha$  production. Consistent with this, treatment with TNF- $\alpha$  enhanced IKK phosphorylation in the control cells in a time-dependent manner (Fig. 3A). Phosphorylation of IKK and I $\kappa$ B $\alpha$  was dramatically reduced in UBB<sup>+1</sup> stable cells. In addition, the proteolytic degradation and de novo synthesis of I $\kappa$ B $\alpha$  were also decreased by ectopic UBB<sup>+1</sup> expression (Fig. 3A).

Next, we examined the effect of UBB<sup>+1</sup> on upstream signaling pathway involved in TNF- $\alpha$ -induced AP-1 activation. It has been shown that activity of AP-1 is regulated by the stress-activated protein kinases (SAPKs) cascades including JNK, which is activated by upstream kinases such as mitogen-activated protein kinase kinase (MKK) 4 [27,28]. In the control cells, treatment with TNF- $\alpha$  induced phosphorylation of MKK4, which in turn was followed by phosphorylation of JNK and c-Jun in a time-dependent manner. Consistent with NF- $\kappa$ B results, phosphorylation of JNK pathway proteins by TNF- $\alpha$  was also attenuated by UBB<sup>+1</sup> expression. On the contrary, TNF- $\alpha$ -induced phosphorylation of ERK was not affected by ectopic expression of UBB<sup>+1</sup>. The inhibitory effect of UBB<sup>+1</sup> was also confirmed in IL-1 $\beta$ -treated cells (data not shown). These results collectively indicate that UBB<sup>+1</sup> inhibited the NF- $\kappa$ B and JNK-AP-1 pathways but not the ERK pathway (Fig. 3B).

### 3. Inhibitory Effect of UBB<sup>+1</sup> on Polyubiquitylation of TRAF Proteins and Subsequent TAK1 Phosphorylation

TAK1 has been identified as a key regulator of IKK and JNK pathway leading to the activation of NF- $\kappa$ B and AP-1 transcription factors in response to proinflammatory cytokines [29]. As expected, TAK1 was phosphorylated upon IL-1 $\beta$  or TNF- $\alpha$  stimulation in a time-dependent manner, which was significantly, attenuated in UBB<sup>+1</sup> stable cell lines (Fig. 4A & B). TRAF proteins are signal transducers that mediate IL-1 $\beta$ - and TNF- $\alpha$ -mediated activation of TAK1 through K63-polyubiquitylation [8,29]. As shown in Fig. 4C, a smear of high molecular weight proteins representing ubiquitylated TRAF6 increased upon IL-1 $\beta$  treatment, whereas these ubiquitylated form of TRAF6 was significantly reduced in UBB<sup>+1</sup> stable cells. Consistent with this, TRAF6-TAK1 interactions were significantly enhanced upon IL-1 $\beta$  treatment, whereas these interactions between ubiquitylated TRAF6 and TAK1 were significantly reduced in UBB<sup>+1</sup> stable cells. TNF- $\alpha$ -induced ubiquitylation of TRAF2 and interaction with TAK1 were also inhibited by UBB<sup>+1</sup> expression (Fig. 4D). These results collectively indicated that UBB<sup>+1</sup> potentially abrogated ubiquitin-dependent TAK1 activation and subsequent activation of NF- $\kappa$ B and JNK pathway.

## Discussion

In this report, we have demonstrated that UBB<sup>+1</sup> may affect proinflammatory signaling in the CNS via inhibitory mechanisms of ubiquitin-dependent signaling in human astrocytes. To our best knowledge, it is the first study of the potential role of UBB<sup>+1</sup> on the inflammatory function in the astrocytes, with an emphasis on IL-1 $\beta$  and TNF- $\alpha$  signaling.

The accumulation of UBB<sup>+1</sup> has been regarded to represent the proteasomal dysfunction in the diseased brain [30]. The levels of UBB<sup>+1</sup> protein preceded functional impairment of the UPS in a dose-dependent manner, shifting from a proteasome substrate to a reversible inhibitor of the UPS. UBB<sup>+1</sup> can also be degraded by the proteasome via internal K29- or K48-linked polyubiquitylation at low levels of expression; however, at higher concentration, UBB<sup>+1</sup> can act as a reversible antagonist of the UPS [8,9].

It has been increasingly appreciated that ubiquitylation of the UBB<sup>+1</sup> can also occur at the internal residue of K63, which gives rise to K63 polyubiquitin chains [31,32]. The K63 ubiquitylation has been proposed to regulate various cellular signaling through non-proteolytic mechanisms [3,33]. Thus we hypothesized that ubiquitylated UBB<sup>+1</sup> can alter cell homeostasis and signaling pathways in K63-dependent cascades but not K48-dependent proteasomal degradation pathway. The rationale for the hypothesis was originated from our previous observation that proteasome inhibition paradoxically enhanced proinflammatory cytokine signaling in human astrocytes [22]. We further demonstrated that the inhibitory effect of mutant ubiquitin is mainly attributed to decreased activity of UPS-independent function of ubiquitin by computational modeling and simulation [34]. It has also been proposed that UBB<sup>+1</sup> ubiquitylation at K63 might exert harmful effect by enhancing NF- $\kappa$ B activity and subsequent NF- $\kappa$ B-mediated inflammatory processes [31]. Recently, it has been shown that unanchored K63 polyubiquitin chains can regulate multiple cellular signaling including direct modulation of the NF- $\kappa$ B pathway [33]. Our current observation did not support the proinflammatory role of UBB<sup>+1</sup> in the CNS by showing anti-inflammatory action. Even though we have clearly demonstrated that UBB<sup>+1</sup> can affect the cellular signaling in proteasome-independent manner, the precise molecular mechanisms underlying inhibitory action should be investigated.

Alternative action of UBB<sup>+1</sup> has also been proposed for pathological degeneration of neurons in the AD brains [35]. Mutant ubiquitin causes extensive neuritic beading of mitochondria in association with neuronal degeneration probably due to inefficient axonal transport. For normal neuronal activity, mitochondria should be transported and exchanged to and from the axonal ends. Therefore, suppression of mitochondria transport can affect the neuronal activity. Recently, mitochondrial dynamics have been extensively studied for the role of differentiation and degeneration of neurons and other types of cells in the CNS [36]. Mitochondrial dynamics can be controlled by sets of proteins involving mitochondrial fission and fusion, and mitophagy [37,38]. These proteins can also be dynamically regulated by the UPS-

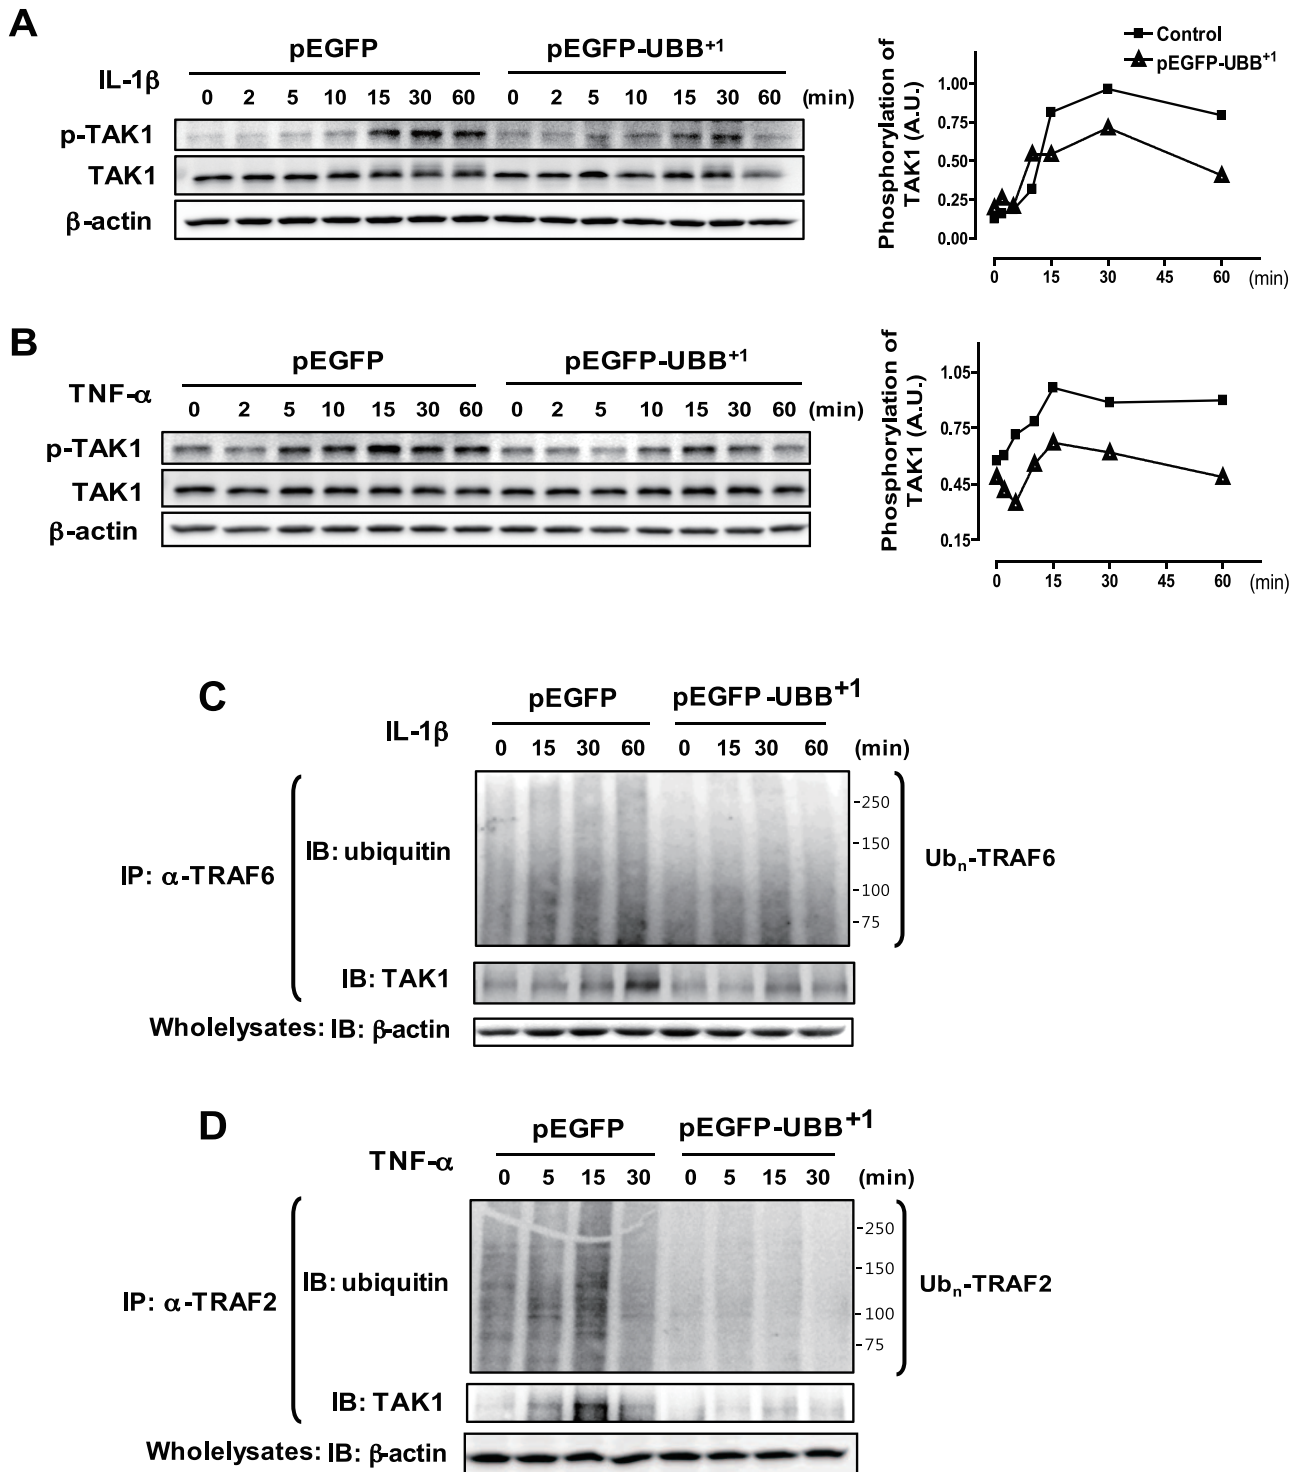

**Figure 4. Inhibitory effect of UBB<sup>+1</sup> on IL-1β- and TNF-α-induced TAK1 phosphorylation by polyubiquitylation of TRAF6 and TRAF2.** CRT-MG cells stably expressing pEGFP or pEGFP-UBB<sup>+1</sup> were treated with IL-1β (A) or TNF-α (B) for the indicated time periods. Cell lysates were examined by immunoblot analysis with antibodies to phospho-TAK1, TAK1 and β-actin. The relative amount of phosphorylated TAK1 was plotted over the time upon IL-1β and TNF-α treatment in pEGFP-UBB<sup>+1</sup> stable cells (triangle) and pEGFP stable cells (square). Representative of three independent experiments. (C) Cells were treated with IL-1β for the indicated time periods, and then lysates were precipitated with anti-TRAF6 and blotted with anti-Ub. The whole cell lysates were subject to immunoblot analysis with antibodies to TAK1 and β-actin. Smear of high molecular weight proteins by ubiquitin blots represent poly-ubiquitylated TRAF6. (D) Cells were treated with TNF-α for the indicated time periods, and then lysates were precipitated with anti-TRAF2 and blotted with anti-Ub. The whole cell lysates were examined by immunoblot analysis with antibodies to TAK1 and β-actin. Smear of high molecular weight proteins by ubiquitin blots represent poly-ubiquitylated TRAF2. Representative of two independent experiments.  
doi:10.1371/journal.pone.0067891.g004



dependent and UPS-independent mechanisms. We are now investigating the potential role of UBB<sup>+1</sup> in mitochondrial dynamics in various cell types and its functional significance.

Sustained inflammation is the hallmark of the AD brains mainly occurring in the pathologically vulnerable areas accompanied by activation of microglia and astrocytes and release of proinflammatory cytokines such as TNF- $\alpha$  and IL-1 $\beta$ . The concomitant activation of glial cells and secretion of inflammatory mediators constitute a deleterious positive feedback loop contributing to neuronal dysfunction and eventually cell death. Therefore, the inhibitory effect of UBB<sup>+1</sup> on cytokine signaling might be

beneficial in terms of neuroinflammation and neurodegeneration. However, the expression of UBB<sup>+1</sup> can affect cellular functions via multiple mechanisms other than anti-inflammation. The overall outcome of UBB<sup>+1</sup> should be reconsidered in the context of balance between tissue damage and accompanying inflammation.

## Author Contributions

Conceived and designed the experiments: KC CC. Performed the experiments: KC JP. Analyzed the data: KC EH JL. Contributed reagents/materials/analysis tools: KC. Wrote the paper: KC CC.

## References

- Mukhopadhyay D, Riezman H (2007) Proteasome-independent functions of ubiquitin in endocytosis and signaling. *Science* 315: 201–205.
- Weissman AM (2001) Themes and variations on ubiquitylation. *Nat Rev Mol Cell Biol* 2: 169–178.
- Chen ZJ, Sun LJ (2009) Nonproteolytic functions of ubiquitin in cell signaling. *Mol Cell* 33: 275–286.
- Komander D, Rape M (2012) The ubiquitin code. *Annu Rev Biochem* 81: 203–229.
- van Leeuwen FW, de Kleijn DP, van den Hurk HH, Neubauer A, Sonnemans MA, et al. (1998) Frameshift mutants of beta amyloid precursor protein and ubiquitin-B in Alzheimer's and Down patients. *Science* 279: 242–247.
- Hol EM, van Leeuwen FW, Fischer DF (2005) The proteasome in Alzheimer's disease and Parkinson's disease: lessons from ubiquitin B+1. *Trends Mol Med* 11: 488–495.
- de Pril R, Fischer DF, van Leeuwen FW (2006) Conformational diseases: an umbrella for various neurological disorders with an impaired ubiquitin-proteasome system. *Neurobiol Aging* 27: 515–523.
- Lindsten K, de Vrij FM, Verhoef LG, Fischer DF, van Leeuwen FW, et al. (2002) Mutant ubiquitin found in neurodegenerative disorders is a ubiquitin fusion degradation substrate that blocks proteasomal degradation. *J Cell Biol* 157: 417–427.
- van Tijn P, de Vrij FM, Schuurman KG, Dantuma NP, Fischer DF, et al. (2007) Dose-dependent inhibition of proteasome activity by a mutant ubiquitin associated with neurodegenerative disease. *J Cell Sci* 120: 1615–1623.
- Fischer DF, De Vos RA, Van Dijk R, De Vrij FM, Proper EA, et al. (2003) Disease-specific accumulation of mutant ubiquitin as a marker for proteasomal dysfunction in the brain. *Faseb J* 17: 2014–2024.
- de Pril R, Fischer DF, Maat-Schieman ML, Hobo B, de Vos RA, et al. (2004) Accumulation of aberrant ubiquitin induces aggregate formation and cell death in polyglutamine diseases. *Hum Mol Genet* 13: 1803–1813.
- De Vrij FM, Sluijs JA, Gregori L, Fischer DF, Hermens WT, et al. (2001) Mutant ubiquitin expressed in Alzheimer's disease causes neuronal death. *Faseb J* 15: 2680–2688.
- Fratta P, Engel WK, Van Leeuwen FW, Hol EM, Vattemi G, et al. (2004) Mutant ubiquitin UBB+1 is accumulated in sporadic inclusion-body myositis muscle fibers. *Neurology* 63: 1114–1117.
- Olive M, van Leeuwen FW, Janue A, Moreno D, Torrejon-Escribano B, et al. (2008) Expression of mutant ubiquitin (UBB+1) and p62 in myotilinopathies and desminopathies. *Neuropathol Appl Neurobiol* 34: 76–87.
- Dong Y, Benveniste EN (2001) Immune function of astrocytes. *Glia* 36: 180–190.
- Ransohoff RM, Brown MA Innate immunity in the central nervous system. *J Clin Invest* 122: 1164–1171.
- Jones RW (2001) Inflammation and Alzheimer's disease. *Lancet* 358: 436–437.
- Weninger SC, Yankner BA (2001) Inflammation and Alzheimer disease: the good, the bad, and the ugly. *Nat Med* 7: 527–528.
- Owens T, Babcock AA, Millward JM, Toft-Hansen H (2005) Cytokine and chemokine inter-regulation in the inflamed or injured CNS. *Brain Res Brain Res Rev* 48: 178–184.
- Sun L, Chen ZJ (2004) The novel functions of ubiquitination in signaling. *Curr Opin Cell Biol* 16: 119–126.
- Adhikari A, Xu M, Chen ZJ (2007) Ubiquitin-mediated activation of TAK1 and IKK. *Oncogene* 26: 3214–3226.
- Choi K, Lee J, Choi C (2007) Divergent effect of proteasome inhibition on interleukin-1beta and tumor necrosis factor alpha signaling in human astroglial cells. *FEBS Lett* 581: 4691–4696.
- Choi C, Kutsch O, Park JS, Zhou T, Seol DW, et al. (2002) Tumor Necrosis Factor Related Apoptosis Inducing Ligand (TRAIL) induces caspase-dependent Interleukin-8 expression and apoptosis in human astroglial cells. *Mol Cell Biol* 22: 724–736.
- Bajetto A, Bonavia R, Barbero S, Schettini G (2002) Characterization of chemokines and their receptors in the central nervous system: physiopathological implications. *J Neurochem* 82: 1311–1329.
- Majumder S, Zhou LZ, Ransohoff RM (1996) Transcriptional regulation of chemokine gene expression in astrocytes. *J Neurosci Res* 45: 758–769.
- Karin M, Ben-Neriah Y (2000) Phosphorylation meets ubiquitination: the control of NF- $\kappa$ B activity. *Annu Rev Immunol* 18: 621–663.
- Yamasaki T, Kawasaki H, Nishina H Diverse Roles of JNK and MKK Pathways in the Brain. *J Signal Transduct* 2012: 459265.
- Davis RJ (2000) Signal transduction by the JNK group of MAP kinases. *Cell* 103: 239–252.
- Wang C, Deng L, Hong M, Akkaraju GR, Inoue J, et al. (2001) TAK1 is a ubiquitin-dependent kinase of MKK and IKK. *Nature* 412: 346–351.
- Tank EM, True HL (2009) Disease-associated mutant ubiquitin causes proteasomal impairment and enhances the toxicity of protein aggregates. *PLoS Genet* 5: e1000382.
- Chadwick L, Gentle L, Strachan J, Layfield R (2012) Review: unchained maladie - a reassessment of the role of Ubb(+1)-capped polyubiquitin chains in Alzheimer's disease. *Neuropathol Appl Neurobiol* 38: 118–131.
- van Tijn P, Dennissen EJ, Gentier RJ, Hobo B, Hermes D, et al. (2012) Mutant ubiquitin decreases amyloid beta plaque formation in a transgenic mouse model of Alzheimer's disease. *Neurochem Int* 61: 739–748.
- Xia ZP, Sun L, Chen X, Pineda G, Jiang X, et al. (2009) Direct activation of protein kinases by unanchored polyubiquitin chains. *Nature* 461: 114–119.
- Lee J, Choi K, Choi C (2010) Delineating role of ubiquitination on nuclear factor-kappa B pathway by a computational modeling approach. *Biochem Biophys Res Commun* 391: 33–37.
- Tan Z, Sun X, Hou FS, Oh HW, Hilgenberg LG, et al. (2007) Mutant ubiquitin found in Alzheimer's disease causes neuritic beading of mitochondria in association with neuronal degeneration. *Cell Death Differ* 14: 1721–1732.
- Reddy PH, Shirendeb UP (2012) Mutant huntingtin, abnormal mitochondrial dynamics, defective axonal transport of mitochondria, and selective synaptic degeneration in Huntington's disease. *Biochim Biophys Acta* 1822: 101–110.
- Shaw JM, Nunnari J (2002) Mitochondrial dynamics and division in budding yeast. *Trends Cell Biol* 12: 178–184.
- Escobar-Henriques M, Anton F (2012) Mechanistic perspective of mitochondrial fusion: Tubulation vs. fragmentation. *Biochim Biophys Acta* 1833: 162–175.
